# Supplementary material for: Charge-tunable absorption behavior of DNA on graphene
Source: Royal Society of Chemistry journal article supplement (doi:10.1039/c5tb00635j), 2015-01-01
Supplement: c5tb00635j1.pdf [file c5tb00635j1.pdf]

**Supporting information**  
**Charge-tunable absorption behavior of DNA on graphene**

Zhe Kong<sup>1</sup>, Wei Zheng<sup>2</sup>, Qi Wang<sup>3</sup>, Hongbo Wang<sup>4</sup>, Fengna Xi<sup>5</sup>, Lijun Liang<sup>3, 6, \*</sup>, Jia-Wei Shen<sup>2,\*</sup>

<sup>1</sup>College of Materials and Environmental Engineering, Hangzhou Dianzi University, Hangzhou, 310018, People's Republic of China

<sup>2</sup>School of Medicine, Hangzhou Normal University, Hangzhou 310016, People's Republic of China

<sup>3</sup>Soft Matter Research Center and Department of Chemistry, Zhejiang University, Hangzhou 310027, People's Republic of China

<sup>4</sup>College of Automation, Hangzhou Dianzi University, Hangzhou, 310018, People's Republic of China

<sup>5</sup>Department of Chemistry, Zhejiang Sci-Tech University, Hangzhou, Zhejiang 310018, China

<sup>6</sup>Department of Polymer Science and Engineering, Zhejiang University, Hangzhou 310027, People's Republic of China.

\* Corresponding authors.

Fax: +86 571 87951895.

E-mail addresses:

michael.lijunl@gmail.com (L.J. Liang)

shen.jiawei@hotmail.com (J.-W. Shen)

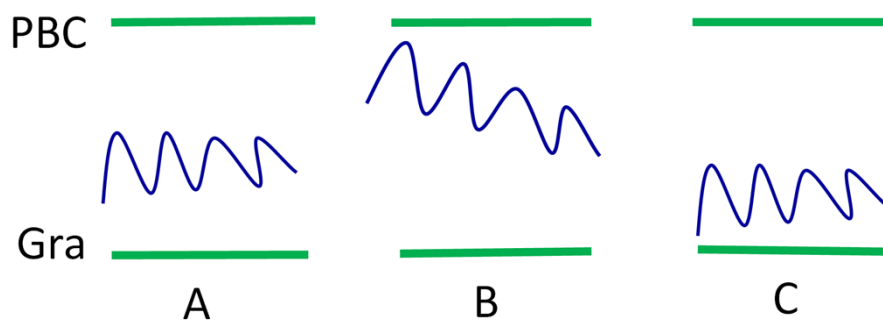

Figure S1. The schematic of DNA absorption on graphene layer (Gra) and the image of graphene layer in z direction. A: The initial simulation setup of DNA on the graphene layer; B: DNA tends to absorb on the image layer; C: DNA finally absorbed on the graphene layer.

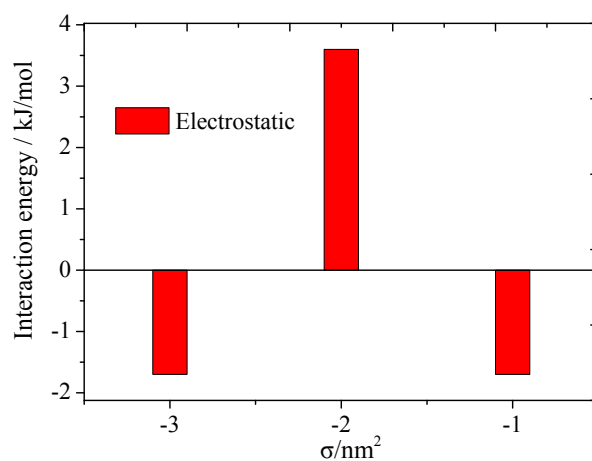

Figure S2. The electrostatic interaction between DNA molecule and graphene with different charge density varied from  $\sigma = -1 \text{ e}/nm^2$  to  $\sigma = -3 \text{ e}/nm^2$  is calculated from last 5 ns of simulations.
